# Supplementary material for: Long mRNAs coding for yeast mitochondrial proteins of prokaryotic origin preferentially localize to the vicinity of mitochondria
Source: Springer Nature journal article supplement (doi:10.1186/gb-2003-4-7-r44), 2003-06-06
Supplement: Additional file 5 [file gb-2003-4-7-r44-s5.doc]

Analysis of Variance Table

Response: MFI

|  | Df | Sum Sq | Mean Sq | F value | Pr(<F) |  |
| --- | --- | --- | --- | --- | --- | --- |
| CLASS | 3 | 0.29495 | 0.09832 | 16.123 | 6.76e-10 | *** |
| Residuals | 388 | 2.36601 | 0.00610 |  |  |  |

Signif. codes: 0 `***' 0.001 `**' 0.01 `*' 0.05 `.' 0.1 ` ' 1
